RESEARCH ARTICLE

# Dermal trypanosomes in seropositive suspects of *gambiense* human African trypanosomiasis in Côte d'Ivoire

Martial Kassi N'Djetchi<sup>1</sup>, Mélina Barkissa Traoré<sup>1</sup>, Innocent Abé<sup>1</sup>, Bamoro Coulibaly<sup>2</sup>, Valentin Nanan<sup>3</sup>, Thomas Konan<sup>1</sup>, Louis N'Dri<sup>2</sup>, Ibrahim Sadissou<sup>4</sup>, Jean-Mathieu Bart<sup>4</sup>, Bruno Bucheton<sup>4</sup>, Magali Tichit<sup>5</sup>, David Hardy<sup>5</sup>, Salimatou Boiro<sup>6</sup>, Aïssata Camara<sup>6</sup>, Christelle Travaillé<sup>7</sup>, Aline Crouzols<sup>7</sup>, Nathalie Petiot<sup>7</sup>, Adeline Ségard<sup>4</sup>, Lingue Kouakou<sup>8</sup>, Mariame Camara<sup>9</sup>, Mamadou Camara<sup>9</sup>, Dramane Kaba<sup>2</sup>, Mathurin Koffi<sup>1</sup>, Vincent Jamonneau<sup>4</sup>, Brice Rotureau<sup>6,7\*</sup>

**1** Laboratoire de Biodiversité et Gestion des Ecosystèmes Tropicaux, Université Jean Lorougnon Guédé, Daloa, Côte d'Ivoire, **2** Unité de Recherche Trypanosomoses, Institut Pierre Richet, Bouaké, Côte d'Ivoire, **3** District Sanitaire, Sinfra, Côte d'Ivoire, **4** Intertryp, Institut de Recherche pour le Développement, Centre de Coopération Internationale en Recherche Agronomique pour le Développement - University of Montpellier, Montpellier, France, **5** Histopathology Platform, Institut Pasteur, Paris, France, **6** Parasitology Unit, Institut Pasteur of Guinea, Conakry, Guinea, **7** Department of Parasites and Insect Vectors, Trypanosome Transmission Group, Trypanosome Cell Biology Unit, INSERM U1347, Institut Pasteur, Université Paris Cité, Paris, France, **8** Programme National d'Élimination de la THA, Abidjan, Côte d'Ivoire, **9** Programme National de Lutte contre la Trypanosomiase Humaine Africaine, Ministère de la Santé, Conakry, Guinea

\* [rotureau@pasteur.fr](mailto:rotureau@pasteur.fr)

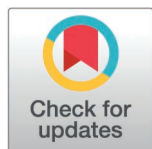

## OPEN ACCESS

**Citation:** N'Djetchi MK, Traoré MB, Abé I, Coulibaly B, Nanan V, Konan T, et al. (2025) Dermal trypanosomes in seropositive suspects of *gambiense* human African trypanosomiasis in Côte d'Ivoire. PLoS Negl Trop Dis 19(8): e0013027. <https://doi.org/10.1371/journal.pntd.0013027>

**Editor:** Maciej Grzybek, Gdansk Uniwersytet Medyczny, POLAND

**Received:** April 1, 2025

**Accepted:** July 28, 2025

**Published:** August 25, 2025

**Copyright:** © 2025 N'Djetchi et al. This is an open access article distributed under the terms of the [Creative Commons Attribution License](https://creativecommons.org/licenses/by/4.0/), which permits unrestricted use, distribution, and reproduction in any medium, provided the original author and source are credited.

**Data availability statement:** All data are in the manuscript and/or [supporting information](#) files.

**Funding:** This work was supported by the Institut Pasteur, the Institut Pasteur of Guinea, the Institut de Recherche pour le Développement, the French National

## Abstract

In the population at risk of *gambiense* human African trypanosomiasis (gHAT), the prevalence of extravascular parasite carriage remains unclear. Here, we conducted an observational clinical study in the hypo-endemic gHAT foci of Sinfra and Bonon in Côte d'Ivoire from 2019 to 2022. A total of 74 individuals were enrolled, including 45 suspects previously found positive at least once in a serological test for gHAT and followed by the national elimination programme of Côte d'Ivoire, as well as 29 seronegative controls. No significant differences between groups were observed for any epidemiological parameters and any clinical parameters at enrolment. Whereas trypanosome DNA was detected in the blood of 0/29 controls and 2/45 suspects, the presence of extravascular dermal trypanosomes was confirmed by immuno-histochemistry (fixed trypanosome cells) and/or PCR (trypanosome DNA) in about 1/3 of the suspects (14/45, 31%). However, no *gambiense*-specific test was found positive in the present study. Hence, the skin could represent an anatomical reservoir for African trypanosomes sustaining a low level of transmission in hypo-endemic foci.

Agency for Scientific Research (project ANR-18-CE15-0012 TrypaDerm), the French Government Investissement d'Avenir programme, Laboratoire d'Excellence "Integrative Biology of Emerging Infectious Diseases" (ANR-10-LABX-62-IBEID) and the Bill and Melinda Gates Foundation ([www.gatesfoundation.org](http://www.gatesfoundation.org)) through the Trypa-NO! Project (grant number INV-001785). The funders had no role in study design, data collection and analysis, decision to publish, or preparation of the manuscript.

**Competing interests:** The authors have declared that no competing interests exist.

## Author summary

In the population at risk of sleeping sickness, the number of people bearing trypanosome parasites in their skin remains unclear. Here, we conducted an observational clinical study in the hypo-endemic transmission foci of Sinfra and Bonon in Côte d'Ivoire from 2019 to 2022. A total of 74 individuals were enrolled, including 45 suspects previously found positive at least once in a test on blood and followed by the national elimination programme of Côte d'Ivoire, as well as 29 negative controls. No significant differences between groups were observed for any epidemiological parameters and any clinical parameters at enrolment. Whereas trypanosome DNA was detected in the blood of 0/29 controls and 2/45 suspects, the presence of dermal trypanosomes was assessed by immuno-histochemistry (fixed trypanosome cells) and/or molecular biology (PCR to detect trypanosome DNA) in about 1/3 of the suspects (14/45, 31%). However, no *gambiense*-specific test was found positive in the present study. Hence, the skin could represent an anatomical reservoir for African trypanosomes sustaining a low level of transmission in hypo-endemic foci.

## Introduction

With only 799 new cases reported in 2022, *gambiense* human African trypanosomiasis (gHAT or sleeping sickness), a neglected tropical disease caused by the tsetse-borne protist parasite *Trypanosoma brucei gambiense*, has been targeted for elimination (zero transmission) by 2030 by the World Health Organization (WHO) [1,2]. Seven countries have already eliminated the disease as a public health problem, including Côte d'Ivoire in 2020, with nine gHAT cases detected in two health districts between 2015 and 2019 [3]. Then, between 2020 and 2022, only one gHAT case was detected in Côte d'Ivoire (Franco et al., 2024) [1]. These results offer encouragements towards the elimination of transmission by the end of 2025 on condition of maintaining a multidisciplinary one health approach and constant research activities to continuously adapt surveillance strategies in the epidemiological transition to zero incidence [3,4].

In Côte d'Ivoire, as well as in any endemic areas, the recommended gHAT diagnosis algorithm relies on three successive steps (Table 1). First, a serological test on blood, such as the card agglutination test for trypanosomiasis (CATT) or a rapid diagnostic test (RDT), is performed [5]. Second, for seropositive subjects only, a parasitological confirmation is required to assess the presence of living trypanosomes in a biological fluid (blood or buffy coat or lymph node aspirate) under a microscope, usually after sample concentration with the mini-anion exchange centrifugation technique (mAECT) [6]. Third, if trypanosomes are detected in the blood, cerebrospinal fluid is sampled by lumbar puncture for searching for trypanosomes under a microscope to determine the disease stage and adapt the treatment accordingly. Seronegative individuals and seropositive subjects without parasitological confirmation are not treated.

Table 1. Diagnostic process.

| Diagnostic result |         | Diagnostic process       |                           |                                   |                  |            |
|-------------------|---------|--------------------------|---------------------------|-----------------------------------|------------------|------------|
|                   |         | 1- Serological screening | 2- Serological validation | 3- Parasitological confirmation   | 4- Staging       |            |
|                   |         | CATTwb/ RDT              | CATTp*                    | mAECT BC/ LN aspirate observation | Parasites in CSF | WBC in CSF |
| Seronegative      |         | —                        |                           |                                   |                  |            |
|                   |         | +                        | < 1/4                     |                                   |                  |            |
| Seropositive      |         | +                        | ≥ 1/4                     | —                                 |                  |            |
| Confirmed         | Stage 1 | +                        | ≥ 1/4                     | +                                 | no               | 0-5        |
|                   | Stage 2 |                          |                           |                                   | yes              | >5         |

CATTwb/ CATTp: card agglutination test for trypanosomiasis on whole blood/ plasma; RDT: Rapid Diagnostic Test for HAT; mAECT BC/ LN aspirate: mini anion-exchange column technique on buffy coat/ lymph node aspirate; WBC: white blood cells; CSF: cerebrospinal fluid; \*Highest plasma dilution with a positive result.

<https://doi.org/10.1371/journal.pntd.0013027.t001>

To move towards gHAT elimination, a combination of both exhaustive and targeted medical screening strategies based on this diagnostic algorithm, as well as vector control programs to reduce the risk of transmission in the most at-risk areas, were implemented in parallel [3]. Among the targeted medical strategies, a follow-up of unconfirmed seropositive subjects, considered as potential latent carriers, was also maintained to diagnose and treat all possible cases as well as to estimate the impact of persisting human reservoirs on the elimination goal [3,7].

Indeed, the presence of *T. b. gambiense* parasites was reported in the extravascular compartment of the mammalian host skin, under experimental conditions in animal models [8,9], and more importantly, during the natural progression of the disease in humans patients [10,11]. Even in absence of detectable parasites in blood, substantial quantities of extravascular trypanosomes persist in the basal layer of the dermis and can be transmitted to the tsetse vector in experimental conditions [8]. The presence of long-term seropositive individuals in the two hypo-endemic foci of Sinfra and Bonon in Côte d'Ivoire prompted us to investigate the involvement of skin-dwelling trypanosomes in this phenomenon. To refine our understanding of the epidemiological importance of skin-dwelling trypanosomes in this context, we performed a prospective observational study in some of the seropositive subjects of the historical cohort of long-term seropositive individuals in Sinfra and Bonon [3,7].

## Methods

### Ethics statement

All investigations were conducted in accordance with the Declaration of Helsinki and fulfil the STROBE criteria. Approval for this study was obtained from the Comité National d'Ethique des Sciences de la Vie et de la Santé de République de Côte d'Ivoire (authorization #111–19/MSHP/CNESVS-kp and amendments). Children under 16 years of age and pregnant women were excluded from the study. Each participant was informed about the study's objectives in their own language and provided written informed consent. For participants between 16–18 years of age, written informed consent was also obtained from their parents. The data of individual study participants were randomly anonymized with a 4-digit code at enrolment by the MD in charge of the medical campaign.

### Study enrolment, screening and group definition

All subjects enrolled in this study came from the hypo-endemic gHAT foci of the Sinfra and Bonon districts, which are located in the central west part of the Republic of Côte d'Ivoire (Fig 1) [3]. All subjects were enrolled in October 2019 during a medical survey performed by the HAT National Elimination Programme, according to WHO recommendations

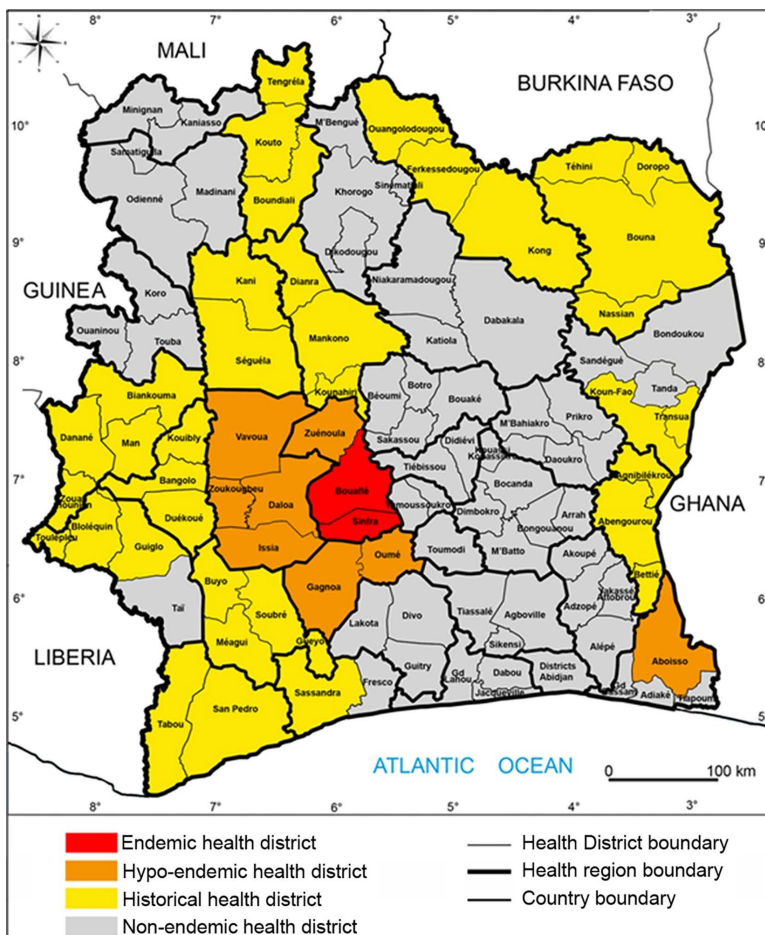

**Fig 1. Map of the hypo-endemic gHAT foci in Côte d'Ivoire.** This map shows the administrative districts of the Republic of Côte d'Ivoire. Hypo-endemic transmission foci in orange, old foci with last cases reported before 2019 in yellow (adapted from [3]). This figure was initially created by the mapping service of our team based at Institut Pierre Richet (Bouaké, Côte d'Ivoire). All the base layers are available here: <https://data.humdata.org/dataset/cote-d-ivoire-settlements> and <https://data.humdata.org/dataset/cod-ab-civ>.

<https://doi.org/10.1371/journal.pntd.0013027.g001>

and as described previously (Table 1) [3,12]. Then, a first follow-up visit was organized in April 2021 and a second one in June 2022 for seropositive subjects only (Table 2). Individuals were screened with the card agglutination test for trypanosomiasis using whole blood samples (CATTwb) at all time-points, and with the SD Bioline HAT 1.0 rapid diagnostic test (RDT) on blood at enrollment only (Table 1). For those individuals who tested positive in the CATTwb or RDT, 5 mL of blood were collected in heparinized tubes and a two-fold plasma dilution series was used to determine the CATT plasma (CATTp) end titer. All individuals with CATTp end titers of 1/4 or higher underwent a microscopic examination of lymph node aspirate, whenever cervical swollen lymph nodes were present. Blood samples of CATTp-positive individuals were also centrifuged to obtain the buffy coat layer, which was tested for trypanosomes using the mini-anion exchange centrifugation test (mAECT BC) [6]. If trypanosomes were detected using this test, the infected individual underwent a lumbar puncture and their disease stage was determined by searching for trypanosomes using the modified simple centrifugation technique for CSF and by white blood cell (WBC) counts [13]. *Gambiense* HAT patients were classified as being stage 1 (0–5 WBC/ $\mu$ L and absence of trypanosomes in CSF) or stage 2 (>5 WBC/ $\mu$ L and/or presence of trypanosomes in CSF) and were treated accordingly by the National Elimination Programme strategy (Table 1).

**Table 2. Group definitions and number of subjects enrolled per visit and group.**

| Groups          | Number of subjects |                  |                  | Status before 2019 |    |              |           | Clinical history                                                                                 |
|-----------------|--------------------|------------------|------------------|--------------------|----|--------------|-----------|--------------------------------------------------------------------------------------------------|
|                 | Enrollement 2019   | Follow-up 1 2021 | Follow-up 2 2022 | CATT               | TL | Parasitology | Treatment |                                                                                                  |
| <b>PCT</b>      | 6                  | 2                | 2                | +                  | +  | +            | +         | Previous case confirmed and treated before 2019                                                  |
| <b>PCU</b>      | 7                  | 5                | 4                | +                  | +  | +            | —         | Previous case confirmed before 2019 but untreated                                                |
| <b>SeroTL</b>   | 19                 | 9                | 5                | +                  | +  | —            | —         | Previous seropositive in CATT and in TL at least once before 2019 but negative in parasitology   |
| <b>SeroCATT</b> | 13                 | 9                | 9                | +                  | —  | —            | —         | Previous seropositive in CATT at least once before 2019 but negative in both TL and parasitology |
| <b>Control</b>  | 29                 | 0                | 0                | —                  | —  | —            | —         | No gHAT history                                                                                  |
| <b>Total</b>    | 74                 | 25               | 20               |                    |    |              |           |                                                                                                  |

CATT: card agglutination test for trypanosomiasis; TL: immune trypanolysis test.

<https://doi.org/10.1371/journal.pntd.0013027.t002>

Subjects were assigned to one of the 5 study groups according to their gHAT clinical history as defined in [Table 2](#): previous cases confirmed and treated before 2019 (PCT), previous cases confirmed before 2019 but left untreated (refusal or lost-to-follow-up after diagnosis) (PCU), individuals found seropositive in CATT and in immune trypanolysis test (TL) at least once before 2019 but who remained negative in parasitology (SeroTL), and individuals found seropositive in CATT at least once before 2019 but negative in both TL and parasitology (SeroCATT). The clinical and diagnostic history of all seropositive individuals (PCT, PCU, SeroTL and SeroCATT) was available from the HAT National Elimination Programme records. In addition, seronegative controls with no gHAT history were randomly enrolled from the neighbourhood of the cohort subjects ([Table 2](#)).

### Field procedure and sampling

As in [\[10\]](#) and [\[11\]](#), at each visit, each participant underwent an epidemiological interview and a clinical examination, during which dermatological symptoms were assessed by a trained dermatologist. The following epidemiological data were collected: age (in years), sex, clinical history of HAT infections in the family since 2010, and occupational risk (occurrence of any regular activities such as farming, wood-cutting mining, hunting and fishing, during which an individual might be exposed to tsetse bites). The following general clinical data were also collected during the interview: fever, swollen cervical lymph nodes, weight loss, asthenia, eating disorders, sexual dysfunctions, repetitive headaches, circadian rhythm disruptions and/or any other behavioral changes during the last three months. Dermatological signs of pruritus (skin itch) and dermatitis (skin inflammation) were also investigated, and a careful examination of the entire body was performed to detect any symptoms that might be related to skin infections.

Finally, two superficial skin snip biopsies were sampled in sterile conditions from the right back shoulder of all enrolled subjects. In this study, the skin region was the same as in Camara *et al.* [\[10\]](#) for comparison, yet the choice of sampling superficial snip biopsies rather than deep punch biopsies was preferred by the HAT National Elimination Programme to limit sampling invasiveness and allow a more rapid healing of the lesion. Biopsies were performed under local anesthesia and were rapidly dressed. One first skin snip was rapidly fixed in 10% neutral buffered formalin at room temperature for immuno-histochemistry, and a second one was preserved in RNAlater at -20°C for molecular analyses. Plasma aliquots (0.5 mL) were also obtained from 10ml blood samples and preserved at -20°C in the field and -80°C in the lab for use in serological trypanolysis tests. An additional 0.5 mL blood sample was also collected preserved at -20°C for PCR.



### Immune trypanolysis test

A plasma sample from all participants was used to perform the immune trypanolysis test. This test detects complement-mediated immune responses activated by either the LiTat 1.3, LiTat 1.5 or LiTat 1.6 variable surface antigens specific for *T. b. gambiense*, as previously described [14,15].

### Immunohistochemical detection of trypanosomes

Skin snip biopsy samples fixed in formalin and preserved at 4°C were trimmed and processed into paraffin blocks in the lab. Longitudinal sections of ~2.5µm were prepared and processed using Dako Autostainer Plus (Dako, Denmark). Sections were immunolabelled with the *T. brucei*-specific anti-ISG65 antibody which targets the Invariant Surface Glycoprotein 65 (rabbit 1/800; gift from M. Carrington, University of Cambridge, UK) [16]. For immunolabelling, a horseradish peroxidase-coupled secondary antibody was used, and the staining was revealed with 3,3'-diaminobenzidine and counterstained with Gill's hematoxylin. A non-infected West African skin specimen (Tissue Solutions Ltd., UK) and a *T. b. gambiense*-infected mouse skin specimen were also included with the samples as technical negative and positive controls, respectively. Immunostaining images were acquired using an automated Axio Observer Z1 microscope (Carl Zeiss, Germany) and analyzed using the ZEN 3.7 software (Carl Zeiss, Germany). The slides from each biopsy were blindly assessed by two readers. The positivity of a given skin-section slide was defined by the detection of at least five clearly morphologically distinguishable and antibody-stained trypanosomes in the most basal region of the dermis. In 2022, skin samples positive in IHC-ISG65 were confirmed in IHC-CRD with the *T. brucei*-specific anti-CRD antibody which targets the cross-reacting determinant (rabbit 1/750; gift from J. Bangs, University at Buffalo, USA) [17].

### TNA extraction

Skin snip biopsy samples in RNeasy lysis buffer and preserved at -20°C were treated for total nucleic acid (TNA) extraction in the lab. A non-infected West African skin specimen (Tissue Solutions Ltd., UK) and a *T. b. gambiense*-infected mouse skin specimen were also included with the samples as negative and positive technical controls, respectively. For blood samples, TNA extraction was performed on 0.5 mL blood aliquots. TNAs were extracted with RNeasy Blood and Tissue kits (Qiagen, Germany) following the manufacturer's recommendations.

### Molecular detection of trypanosome TNA

For all blood and skin samples at all time-points, PCR-TBRN3 detection of *T. brucei* s. l. parasites was performed using primers targeting the DNA satellite repeat sequence (10,000 copies per cell) to generate a 168 bp amplicon [5,10]. For enrollment only, blood and skin samples were also tested in PCR-18S detecting *T. brucei* s. l. parasites [18], as well as in simple PCR-TgsGP directed against the single copy *TgsGP* gene [19].

### Data analyses

All data are available in S1 Table. General descriptive analyses of anonymized data were performed using Excel 16.80 (Microsoft, USA). Statistical analyses were performed using Prism V10.1.1 (GraphPad, USA) software. For diagnostic parameters, differences between seronegative controls and seropositive individuals in each group were assessed using Fisher's exact tests at 5% confidence.

## Results

### Population, follow-up and particular cases

A total of 74 subjects had no exclusion criteria and accepted to be enrolled in the study in 2019. Among them, 45 subjects belonging to the cohort followed up by the HAT National Elimination Programme (Table 2). These include 6 PCT, 7 PCU,

19 SeroTL and 13 SeroCATT. In addition, 29 seronegative controls with no gHAT history were randomly enrolled for the first visit only (Table 2). In 2021 and 2022, respectively 25/45 (56%) and 20/45 (44%) cohort subjects were followed up (Table 2).

As shown in Table 3, no significant differences between groups were observed for any epidemiological parameters and any clinical parameters at enrolment.

One single individual was confirmed as a stage 2 case. This man in his 30's was well-known by the medical team due to an atypical medical history: he was already diagnosed as a stage 2 case 20 years before, but at that time, his family refused the treatment. At enrolment, he was presenting swollen lymph nodes and heavy neurological symptoms, generalized pruritus and dermatitis, and he was tested CATTwb+, CATTp 1/32, RDT SD Bioline HAT+, mAECT- but CSF+ (WBC at 180), TL+, blood PCR+ but skin PCR- and IHC- (subject #1015 CI in S1 Table). He received a standard NECT treatment and was followed up twice. Most clinical signs resolved between the treatment and the first follow-up visit, together with the negatization of the parasitological tests. However, some neurological sequelae were still observed in 2022. His CATTp (1/8) and TL remained positive over the study and all other tests were negative excepted the PCR on skin at follow-up 1.

Two subjects died during the period of the study, yet with no additional information regarding the cause of the deaths. The first subject was a man who was only positive in TL at enrollment and follow-up 1. The second one was a woman with pruritus and dermatitis, who was tested CATTwb+, CATTp-, mAECT-, TL+, skin PCR+ and IHC+ at her last follow-up visit.

### Serological, molecular and histological test results

As compared to the control group at enrollment (0%, 0/29), 77% (10/13), 61% (8/13) and 61% (8/13) individuals in the SeroCATT group were tested positive in CATTwb, CATTp and RDT, respectively (Table 4). Positivity in CATT and RDT

Table 3. Epidemiological and clinical characteristics of subjects.

| Parameters      |                              | Groups                   |                          |                          |                          |                          |
|-----------------|------------------------------|--------------------------|--------------------------|--------------------------|--------------------------|--------------------------|
|                 |                              | Control                  | PCT                      | PCU                      | SeroTL                   | SeroCATT                 |
|                 |                              | n/total (%) or mean (SD) | n/total (%) or mean (SD) | n/total (%) or mean (SD) | n/total (%) or mean (SD) | n/total (%) or mean (SD) |
| Epidemiological | Age*                         | 32.7 (11.3)              | 32.5 (16.8)              | 46.6 (22.2)              | 42.1 (18.1)              | 40.2 (10.8)              |
|                 | Sex (Male)                   | 13/29 (45%)              | 4/6 (67%)                | 5/7 (71%)                | 8/19 (42%)               | 6/13 (46%)               |
|                 | Occupational risk            | 23/28 (82%)              | 2/6 (33%)                | 3/6 (50%)                | 11/19 (58%)              | 11/13 (85%)              |
|                 | HAT case(s) in the family    | 2/27 (7%)                | 3/6 (50%)                | 1/7 (14%)                | 7/19 (37%)               | 2/13 (15%)               |
| Clinical        | Headache                     | 15/27 (55%)              | 2/6 (33%)                | 2/7 (29%)                | 8/19 (42%)               | 4/13 (31%)               |
|                 | Asthenia                     | 12/27 (44%)              | 2/6 (33%)                | 2/7 (29%)                | 7/19 (37%)               | 5/13 (38%)               |
|                 | Fever                        | 10/27 (37%)              | 2/6 (33%)                | 1/7 (14%)                | 5/19 (26%)               | 1/12 (8%)                |
|                 | Any skin symptoms            | 7/28 (25%)               | 2/6 (33%)                | 3/7 (43%)                | 9/19 (47%)               | 3/12 (25%)               |
|                 | Pruritus                     | 5/28 (18%)               | 1/6 (17%)                | 2/7 (29%)                | 8/19 (42%)               | 2/12 (12%)               |
|                 | Dermatitis                   | 3/28 (11%)               | 2/6 (33%)                | 2/7 (29%)                | 3/19 (16%)               | 2/12 (12%)               |
|                 | Swollen LN                   | 2/27 (7%)                | 1/6 (17%)                | 2/7 (29%)                | 5/19 (26%)               | 3/13 (23%)               |
|                 | Eating disorders             | 2/27 (7%)                | 0/6 (0%)                 | 0/7 (0%)                 | 5/19 (26%)               | 0/13 (0%)                |
|                 | Weight loss                  | 2/27 (7%)                | 1/6 (17%)                | 2/7 (29%)                | 5/19 (26%)               | 2/13 (15%)               |
|                 | Circadian rhythm disruptions | 2/27 (7%)                | 1/6 (17%)                | 1/7 (14%)                | 3/19 (16%)               | 2/13 (15%)               |
|                 | Behaviour changes            | 2/27 (7%)                | 1/6 (17%)                | 2/6 (33%)                | 1/19 (5%)                | 0/13 (0%)                |
|                 | Sexual dysfunctions          | 3/27 (4%)                | 0/5 (0%)                 | 0/7 (0%)                 | 3/19 (16%)               | 2/13 (15%)               |

For each group (defined in Table 2) and each parameter, numbers represent the number of positive outcomes for a given parameter out of the total number of available results for this parameter, except for the age presented as mean +/- SD. LN: lymph nodes.

<https://doi.org/10.1371/journal.pntd.0013027.t003>

**Table 4. Serological, molecular and immuno-histological analysis results from blood and skin samples at enrollment.**

| Parameters   |                    | Groups      |             |         |             |         |             |         |             |         |          |  |
|--------------|--------------------|-------------|-------------|---------|-------------|---------|-------------|---------|-------------|---------|----------|--|
|              |                    | Control     |             |         | PCT         |         | PCU         |         | SeroTL      |         | SeroCATT |  |
|              |                    | n/total (%) | n/total (%) | p value | n/total (%) | p value | n/total (%) | p value | n/total (%) | p value |          |  |
| CATT         | Whole blood        | 0/29 (0%)   | 3/6 (50%)   | 0.0031  | 1/7 (14%)   | 0.1944  | 1/19 (5%)   | 0.3958  | 10/13 (77%) | <0.0001 |          |  |
|              | Plasma (≥1/4)      | 0/29 (0%)   | 2/6 (33%)   | 0.0252  | 2/7 (29%)   | 0.0333  | 1/19 (5%)   | 0.3958  | 8/13 (61%)  | <0.0001 |          |  |
| RDT          | SD Bioline HAT 1.0 | 0/29 (0%)   | 2/6 (33%)   | 0.0252  | 2/7 (29%)   | 0.0333  | 1/19 (5%)   | 0.3958  | 8/13 (61%)  | <0.0001 |          |  |
| Trypanolysis | LiTat 1.3          | 0/29 (0%)   | 4/6 (67%)   | 0.0003  | 5/7 (71%)   | <0.0001 | 5/19 (26%)  | 0.0068  | 1/13 (8%)   | 0.3095  |          |  |
|              | LiTat 1.5          | 0/29 (0%)   | 3/6 (50%)   | 0.0031  | 4/7 (57%)   | 0.0006  | 8/19 (42%)  | 0.0002  | 1/13 (8%)   | 0.3095  |          |  |
|              | LiTat 1.6          | 0/29 (0%)   | 4/6 (67%)   | 0.0003  | 3/7 (43%)   | 0.0049  | 6/19 (32%)  | 0.0022  | 1/12 (8%)   | 0.2927  |          |  |
|              | Any VAT            | 0/29 (0%)   | 5/6 (83%)   | <0.0001 | 7/7 (100%)  | <0.0001 | 9/19 (47%)  | <0.0001 | 1/13 (8%)   | 0.3095  |          |  |
| PCR          | Blood              | 0/29 (0%)   | 0/6 (0%)    | >0.9999 | 1/7 (14%)   | 0.1944  | 1/19 (5%)   | 0.3958  | 0/13 (0%)   | >0.9999 |          |  |
|              | Skin               | 1/29 (3%)   | 0/6 (0%)    | >0.9999 | 0/7 (0%)    | >0.9999 | 3/19 (16%)  | 0.2864  | 1/13 (8%)   | 0.5285  |          |  |
| Histology    | IHC-ISG65          | 1/29 (3%)   | 3/6 (50%)   | 0.0114  | 1/6 (17%)   | 0.3176  | 5/17 (29%)  | 0.0205  | 4/10 (40%)  | 0.0110  |          |  |

For each group (defined in Table 2) and each parameter, numbers represent the number of positive outcomes for a given test out of the total number of available results for this test. p values were obtained by comparing one by one the parameters of subjects in the seropositive Vs. seronegative groups using two-sided Fisher's exact tests at 5% confidence. CATT: card agglutination test for trypanosomiasis; RDT: Rapid Diagnostic Test for HAT; PCR: polymerase chain reaction against TBR; IHC: immuno-histochemistry against the invariant surface glycoprotein 65 (ISG65).

<https://doi.org/10.1371/journal.pntd.0013027.t004>

was also observed in the other groups, especially in treated and untreated previous cases (PCT and PCU), but this was significantly different from the control group only for PCT in CATTwb (3/6, 50%). In contrast, the positivity rates in TL for all VATs among the treated and untreated previous cases, as well as in seroTL individuals, was significantly greater than in the control group (0/29, 0%) (Table 4). No significant difference was observed between groups neither in PCR on blood nor in PCR on skin. However, 3 subjects in the SeroTL group and 1 in the SeroCATT group were found positive in PCR on skin (Table 4). The control subject tested positive in both PCR on skin and IHC was seronegative in all tests but was presenting a generalized pruritus, asthenia and headache for 2 two months (S1 Table). Importantly, immuno-histological analyses of skin samples revealed that parasites can be detected in all groups (Fig 2), and with significantly higher proportions of subjects of the PCT group (3/6, 50%) and the SeroCATT group (4/10, 40%), as compared to seronegative controls (1/29, 3%) (Table 4). In total, the presence of extravascular dermal trypanosomes was assessed by IHC (fixed trypanosome cells) and/or PCR (trypanosome DNA) on skin in about 1/3 of the cohort subjects (14/45, 31%) (S1 Table).

Follow-up results presented in Table 5 show some positive results in all tests in all groups with variations over time, yet without clear trend, especially because of the limited number of subjects. The most striking observations over time were the persistence of positivity in TL in all previous untreated cases (PCU) and the occurrence of some positive results in PCR on skin and/or IHC in all groups.

## Discussion

To refine our observations of extravascular dermal trypanosome carriage [10,11], we investigated whether *T. b. gambiense* parasites might also be found in the skin of seropositive suspects in hypo-endemic foci in Côte d'Ivoire.

Here, we observed a non-negligible proportion (about 1/3) of unconfirmed seropositive subjects with extravascular trypanosomes detected in the skin by molecular biology (trypanosome DNA) and/or immuno-histochemistry (trypanosome cells) approaches, demonstrating that this phenomenon is not restricted to the active transmission foci in Guinea. However, the frequency of dermal trypanosome carriage observed at enrolment in seropositive suspects was apparently lower than in Guinea, and more importantly, not clearly associated neither with dermatological signs nor with serological positivity in any test. As compared to previous case/control studies [10,11,20], the unusual and heterogeneous composition



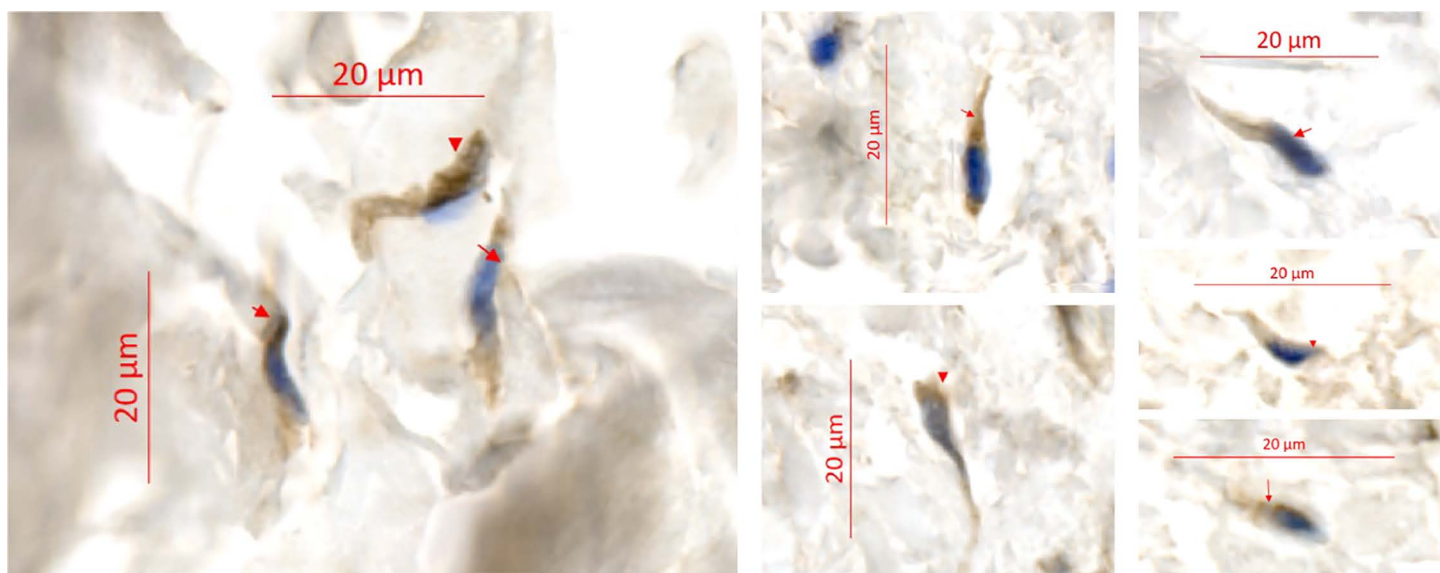

**Fig 2. Dermal trypanosomes evidenced in human skin sections.** Formalin-fixed paraffin-embedded skin sections were immunolabelled with the *T. brucei*-specific anti-ISG65 antibody (in brown). Immunostaining images were acquired using an automated Axioscan Z1 slide-scanner. The positivity of a given skin-section slide was defined by the detection of at least five clearly distinguishable trypanosomes in the dermis, here indicated with red arrows. Their cell body is stained in brown and their nuclei in blue. The scale bars show 20μm.

<https://doi.org/10.1371/journal.pntd.0013027.g002>

**Table 5. Serological, molecular and immuno-histological analysis results from blood and skin samples at follow-up visits.**

| Test results                | Groups (n/total) |      |      |           |      |      |      |              |        |      |      |             |          |      |      |             |
|-----------------------------|------------------|------|------|-----------|------|------|------|--------------|--------|------|------|-------------|----------|------|------|-------------|
|                             | PCT              |      |      |           | PCU  |      |      |              | SeroTL |      |      |             | SeroCATT |      |      |             |
|                             | 2019             | 2021 | 2022 | Total     | 2019 | 2021 | 2022 | Total        | 2019   | 2021 | 2022 | Total       | 2019     | 2021 | 2022 | Total       |
| CATTwb +                    | 2/2              | 2/2  | 0/2  | 4/6 (66%) | 1/5  | 2/5  | 0/4  | 3/14 (21%)   | 1/9    | 1/9  | 1/5  | 3/23 (13%)  | 7/9      | 7/9  | 4/9  | 18/27 (67%) |
| At least one VAT+ in TL     | 1/2              | 2/2  | 2/2  | 5/6 (83%) | 5/5  | 5/5  | 4/4  | 14/14 (100%) | 6/9    | 7/9  | 1/5  | 14/23 (61%) | 1/9      | 1/9  | 0/9  | 2/27 (7%)   |
| At least one PCR + on blood | 0/2              | 0/2  | 1/2  | 1/6 (17%) | 1/5  | 0/5  | 0/4  | 1/14 (7%)    | 0/9    | 0/8  | 1/5  | 1/22 (4%)   | 0/9      | 0/9  | 1/9  | 1/27 (4%)   |
| At least one PCR + on skin  | 0/2              | 1/2  | 0/2  | 1/6 (17%) | 0/5  | 3/5  | 0/4  | 3/14 (21%)   | 2/9    | 3/8  | 1/5  | 6/22 (27%)  | 1/9      | 3/9  | 0/9  | 4/27 (15%)  |
| At least one IHC +          | 1/2              | 1/1  | 1/2  | 3/5 (60%) | 1/4  | 4/5  | 0/4  | 5/13 (38%)   | 3/7    | 6/8  | 2/5  | 11/20 (55%) | 2/6      | 6/8  | 1/9  | 9/23 (39%)  |

For each group (defined in Table 2) and each parameter, numbers represent the number of positive outcomes for a given test out of the total number of available results for this test. CATT: card agglutination test for trypanosomiasis; RDT: Rapid Diagnostic Test for HAT; PCR: polymerase chain reaction against TBR; IHC: immuno-histochemistry against the invariant surface glycoprotein 65 (ISG65).

<https://doi.org/10.1371/journal.pntd.0013027.t005>

of the cohort followed-up in the present study likely explains these intriguing observations. Indeed, the cohort includes 45 subjects who were either previously treated HAT cases, ancient non-treated HAT cases (treatment refusals) or long-lasting seropositive individuals, with the common point of being detected with a variable seropositivity over several years of follow-up. Yet, in the present study, no correlation was observed between CATT or TL and positivity in dermal parasite detection by molecular methods. Could this result from a particular immune response in the dermal anatomical niche of these subjects with immunogenetic specificities?

Among PCU, only 17% and 0% were found positive in IHC and PCR on skin, respectively. These results could be interpreted as self-cures, yet, as discussed previously [11], the proportion of skin samples found positive for trypanosomes (DNA or fixed cells) could rather likely be under-estimated due to the superficial nature of snip biopsies that necessarily contain less dermal tissue than punch biopsies, and therefore potentially less dermal trypanosomes that were shown to be enriched in the basal dermis [8]. As there exist only few reports and no gold-standard approach for detection of trypanosomes in the human skin [10,11,21], we implemented complementary molecular and immuno-histological methods in parallel. As discussed previously, these methods have their own specific strengths and weaknesses [10]. Considering that *T.b. brucei* are theoretically non-infectious to humans and are killed within a couple of hours by human serum *in vitro* [22], the dermal parasites detected here are likely to be *T.b. gambiense* parasites, although the well-known low sensitivity of the TgsGP-PCR reference assay targeting a single copy gene did not allow us to confirm their identity in this study [23,24]. This questions the exact identity of the skin-dwelling trypanosomes that are found in all groups studied here. They are detected in subjects with negative trypanolysis tests (seroCATT), yet their presence is apparently also linked to positivity in CATT and/or RDT in the other groups, which also emphasizes the need to better understand the underlying immune mechanisms.

As recently observed in Cameroon [25], one possible explanation for the persistence of disease foci in certain regions is the presence of animal reservoirs carrying trypanosomes in both blood and skin [26]. Another possibility is that traditionally used diagnostic approaches based on blood examination do not detect some *T.b. gambiense* infections among seropositive cases [26]. Mathematical modelling predicted that, in the absence of any animal reservoirs, these unconfirmed seropositive individuals could contribute to disease transmission by maintaining an overlooked reservoir of skin-dwelling parasites, which would slow down progress towards elimination [27]. The phenomenon of human trypanotolerance, that was first described in Côte d'Ivoire in an initial cohort of about 50 seropositive subjects [7], could be reinforced here, by the detection of skin-dwelling trypanosomes in some of these individuals with no parasite detectable in the blood. Nevertheless, considering the limited number of seropositive individuals, the duration of vector control activities in the studied regions, and in absence of confirmed cases, their potential role in contributing to inter-human transmission is likely limited in comparison to the situation observed in Guinea [28].

In total, these results raise questions about the strategies used to diagnose this disease as the detection of skin-dwelling trypanosomes would allow more carriers to be treated. The current WHO recommendation, based on risk-benefit analyses, is to not treat unconfirmed seropositive individuals without knowing if they have an active infection [29]. With the promise of Acoziborole, a new cheaper and less toxic drug that only requires a single oral administration, the policy of treating unconfirmed seropositive individuals bearing dermal trypanosomes could possibly be reconsidered [30]. This would certainly benefit the epidemiological transition to zero incidence and the sustained elimination of transmission.

## Supporting information

**S1 Table. Raw data used in the study.** Empty cells correspond to absent data (information/ sample not collected or test not done), 0 for negative occurrence/ result and 1 for positive occurrence/ result. M: male; F: female; ID: anonymized subject identifier; LN: lymph nodes; CATTwb/ CATTp: card agglutination test for trypanosomiasis on whole blood/ plasma; RDT: Rapid Diagnostic Test for HAT; mAECTbc: mini anion-exchange column technique on buffy coat; WBC: white blood cells; TL: trypanolysis immune test; PCR: polymerase chain reaction against TBR; IHC: immuno-histochemistry against the invariant surface glycoprotein 65 (ISG65). Enrolment in 2019, first follow-up visit in 2021 and second in 2022. (XLSX)

## Acknowledgments

We thank M. Carrington (University of Cambridge, UK) and J. Bangs (University at Buffalo, USA) for providing antibodies. We warmly thank the team of the Programme National d'Élimination de la Trypanosomiase Humaine Africaine of Côte d'Ivoire, the Institut Pierre Richet of Bouaké and the University Jean Lorougnon Guédé of Daloa, as well as all our collaborators of the Sinfra and Bonon Health Departments.

## Author contributions

**Conceptualization:** Brice Rotureau.

**Data curation:** Vincent Jamonneau, Brice Rotureau.

**Formal analysis:** Vincent Jamonneau, Brice Rotureau.

**Funding acquisition:** Vincent Jamonneau, Brice Rotureau.

**Investigation:** Martial Kassi N'Djetchi, Mélika Barkissa Traoré, Innocent Abé, Bamoro Coulibaly, Valentin Nanon, Thomas Konan, Louis N'Dri, Ibrahim Sadissou, Jean-Mathieu Bart, Bruno Bucheton, Magali Tichit, Salimatou Boiro, Aïssata Camara, Christelle Travaillé, Aline Crouzols, Nathalie Petiot, Adeline Ségard, Mariame Camara, Vincent Jamonneau, Brice Rotureau.

**Project administration:** David Hardy, Lingue Kouakou, Mamadou Camara, Dramane Kaba, Mathurin Koffi, Vincent Jamonneau, Brice Rotureau.

**Supervision:** David Hardy, Mamadou Camara, Dramane Kaba, Mathurin Koffi, Vincent Jamonneau, Brice Rotureau.

**Validation:** Vincent Jamonneau, Brice Rotureau.

**Visualization:** Brice Rotureau.

**Writing – original draft:** Brice Rotureau.

**Writing – review & editing:** Martial Kassi N'Djetchi, Bruno Bucheton, Vincent Jamonneau, Brice Rotureau.

## References

1. Franco JR, Priotto G, Paone M, Cecchi G, Ebeja AK, Simarro PP, et al. The elimination of human African trypanosomiasis: Monitoring progress towards the 2021–2030 WHO road map targets. *PLoS Negl Trop Dis*. 2024;18(4):e0012111. <https://doi.org/10.1371/journal.pntd.0012111> PMID: [38626188](https://pubmed.ncbi.nlm.nih.gov/38626188/)
2. WHO. Ending the neglect to attain the Sustainable Development Goals: A road map for neglected tropical diseases 2021–2030. Dr Malecela Mwelecele Ntuli/ Neglected tropical diseases ed. diseases DMMNNT, editor. Geneva: WHO; 2021. p. 196.
3. Kaba D, Koffi M, Kouakou L, N'Gouan EK, Djohan V, Courtin F, et al. Towards the sustainable elimination of gambiense human African trypanosomiasis in Côte d'Ivoire using an integrated approach. *PLoS Negl Trop Dis*. 2023;17(7):e0011514. <https://doi.org/10.1371/journal.pntd.0011514> PMID: [37523361](https://pubmed.ncbi.nlm.nih.gov/37523361/)
4. Rotureau B, Waleckx E, Jamonneau V, Solano P, Molia S, Debré P, et al. Enhancing research integration to improve One Health actions: learning lessons from neglected tropical diseases experiences. *BMJ Glob Health*. 2022;7(6):e008881. <https://doi.org/10.1136/bmjgh-2022-008881> PMID: [35688485](https://pubmed.ncbi.nlm.nih.gov/35688485/)
5. N'Djetchi MK, Camara O, Koffi M, Camara M, Kaba D, Kaboré J, et al. Specificity of serological screening tests and reference laboratory tests to diagnose gambiense human African trypanosomiasis: a prospective clinical performance study. *Infect Dis Poverty*. 2024;13(1):53. <https://doi.org/10.1186/s40249-024-01220-5> PMID: [38978124](https://pubmed.ncbi.nlm.nih.gov/38978124/)
6. Camara M, Camara O, Ilboudo H, Sakande H, Kaboré J, N'Dri L, et al. Sleeping sickness diagnosis: use of buffy coats improves the sensitivity of the mini anion exchange centrifugation test. *Trop Med Int Health*. 2010;15(7):796–9. <https://doi.org/10.1111/j.1365-3156.2010.02546.x> PMID: [20497407](https://pubmed.ncbi.nlm.nih.gov/20497407/)
7. Jamonneau V, Ilboudo H, Kaboré J, Kaba D, Koffi M, Solano P, et al. Untreated human infections by *Trypanosoma brucei* gambiense are not 100% fatal. *PLoS Negl Trop Dis*. 2012;6(6):e1691. <https://doi.org/10.1371/journal.pntd.0001691> PMID: [22720107](https://pubmed.ncbi.nlm.nih.gov/22720107/)
8. Capewell P, Cren-Travaillé C, Marchesi F, Johnston P, Clucas C, Benson RA, et al. The skin is a significant but overlooked anatomical reservoir for vector-borne African trypanosomes. *Elife*. 2016;5:e17716. <https://doi.org/10.7554/eLife.17716> PMID: [27653219](https://pubmed.ncbi.nlm.nih.gov/27653219/)
9. Calvo-Alvarez E, Ngouné JMT, Sharma P, Cooper A, Camara A, Travaillé C, et al. FLAGellum Member 8 modulates extravascular distribution of African trypanosomes. *PLoS Pathog*. 2023;19(12):e1011220. <https://doi.org/10.1371/journal.ppat.1011220> PMID: [38127941](https://pubmed.ncbi.nlm.nih.gov/38127941/)
10. Camara M, Soumah AM, Ilboudo H, Travaillé C, Clucas C, Cooper A, et al. Extravascular Dermal Trypanosomes in Suspected and Confirmed Cases of gambiense Human African Trypanosomiasis. *Clin Infect Dis*. 2021;73(1):12–20. <https://doi.org/10.1093/cid/ciaa897> PMID: [32638003](https://pubmed.ncbi.nlm.nih.gov/32638003/)
11. Soumah AM, Camara M, Kaboré JW, Sadissou I, Ilboudo H, Travaillé C, et al. Prevalence of dermal trypanosomes in suspected and confirmed cases of gambiense human African trypanosomiasis in Guinea. *PLoS Negl Trop Dis*. 2024;18(8):e0012436. <https://doi.org/10.1371/journal.pntd.0012436> PMID: [39159265](https://pubmed.ncbi.nlm.nih.gov/39159265/)

12. Ilboudo H, Jamonneau V, Camara M, Camara O, Dama E, Leno M, et al. Diversity of response to *Trypanosoma brucei* gambiense infections in the Forécariah mangrove focus (Guinea): perspectives for a better control of sleeping sickness. *Microbes Infect.* 2011;13(11):943–52. <https://doi.org/10.1016/j.micinf.2011.05.007> PMID: 21658462
13. Miézan TW, Meda HA, Doua F, Djè NN, Lejon V, Büscher P. Single centrifugation of cerebrospinal fluid in a sealed pasteur pipette for simple, rapid and sensitive detection of trypanosomes. *Trans R Soc Trop Med Hyg.* 2000;94(3):293. [https://doi.org/10.1016/s0035-9203\(00\)90327-4](https://doi.org/10.1016/s0035-9203(00)90327-4) PMID: 10975002
14. Van Meirvenne N, Magnus E, Buscher P. Evaluation of variant specific trypanolysis tests for serodiagnosis of human infections with *Trypanosoma brucei* gambiense. *Acta Trop.* 1995;60(3):189–99. [https://doi.org/10.1016/0001-706x\(95\)00127-z](https://doi.org/10.1016/0001-706x(95)00127-z) PMID: 8907397
15. Jamonneau V, Bucheton B, Kaboré J, Ilboudo H, Camara O, Courtin F, et al. Revisiting the immune trypanolysis test to optimise epidemiological surveillance and control of sleeping sickness in West Africa. *PLoS Negl Trop Dis.* 2010;4(12):e917. <https://doi.org/10.1371/journal.pntd.0000917> PMID: 21200417
16. Ziegelbauer K, Overath P. Organization of two invariant surface glycoproteins in the surface coat of *Trypanosoma brucei*. *Infect Immun.* 1993;61(11):4540–5. <https://doi.org/10.1128/iai.61.11.4540-4545.1993> PMID: 8406850
17. Zamze SE, Ferguson MA, Collins R, Dwek RA, Rademacher TW. Characterization of the cross-reacting determinant (CRD) of the glycosyl-phosphatidylinositol membrane anchor of *Trypanosoma brucei* variant surface glycoprotein. *Eur J Biochem.* 1988;176(3):527–34. <https://doi.org/10.1111/j.1432-1033.1988.tb14310.x> PMID: 2458923
18. Deborggraeve S, Lejon V, Ekangu RA, Mumba Ngoyi D, Pati Pyana P, Ilunga M, et al. Diagnostic accuracy of PCR in gambiense sleeping sickness diagnosis, staging and post-treatment follow-up: a 2-year longitudinal study. *PLoS Negl Trop Dis.* 2011;5(2):e972. <https://doi.org/10.1371/journal.pntd.0000972> PMID: 21364966
19. Radwanska M, Claes F, Magez S, Magnus E, Perez-Morga D, Pays E, et al. Novel primer sequences for polymerase chain reaction-based detection of *Trypanosoma brucei* gambiense. *Am J Trop Med Hyg.* 2002;67(3):289–95. <https://doi.org/10.4269/ajtmh.2002.67.289> PMID: 12408669
20. Blum JA, Neumayr AL, Hatz CF. Human African trypanosomiasis in endemic populations and travellers. *Eur J Clin Microbiol Infect Dis.* 2012;31(6):905–13. <https://doi.org/10.1007/s10096-011-1403-y> PMID: 21901632
21. McGovern TW, Williams W, Fitzpatrick JE, Cetron MS, Hepburn BC, Gentry RH. Cutaneous manifestations of African trypanosomiasis. *Arch Dermatol.* 1995;131(10):1178–82. PMID: 7574836
22. Hajduk SL, Hager K, Esko JD. High-density lipoprotein-mediated lysis of trypanosomes. *Parasitol Today.* 1992;8(3):95–8. [https://doi.org/10.1016/0169-4758\(92\)90247-y](https://doi.org/10.1016/0169-4758(92)90247-y) PMID: 15463583
23. Compaoré CFA, Kaboré J, Ilboudo H, Thomas LF, Falzon LC, Bamba M, et al. Monitoring the elimination of gambiense human African trypanosomiasis in the historical focus of Batié, South-West Burkina Faso. *Parasite.* 2022;29:25. <https://doi.org/10.1051/parasite/2022024> PMID: 35543528
24. Ilboudo H, N'Djetchi MK, Kaboré WJ, Kaboré J, Traoré BM, Tahita MC, et al. Evaluation of the AnTat A/B and LiTat A/B primers for the detection of *Trypanosoma brucei* gambiense. *Exp Parasitol.* 2025;271:108929. <https://doi.org/10.1016/j.exppara.2025.108929> PMID: 40044069
25. Magang EMK, Kamga RMN, Telleria J, Tichit M, Crouzols A, Kaboré J, et al. Prevalence of blood and skin trypanosomes in domestic and wild fauna from two sleeping sickness foci in Southern Cameroon. *PLoS Negl Trop Dis.* 2023;17(7):e0011528. <https://doi.org/10.1371/journal.pntd.0011528> PMID: 37498955
26. Informal Expert Group on Gambiense HAT Reservoirs, Büscher P, Bart J-M, Boelaert M, Bucheton B, Cecchi G, et al. Do Cryptic Reservoirs Threaten Gambiense-Sleeping Sickness Elimination?. *Trends Parasitol.* 2018;34(3):197–207. <https://doi.org/10.1016/j.pt.2017.11.008> PMID: 29396200
27. Aliee M, Keeling MJ, Rock KS. Modelling to explore the potential impact of asymptomatic human infections on transmission and dynamics of African sleeping sickness. *PLoS Comput Biol.* 2021;17(9):e1009367. <https://doi.org/10.1371/journal.pcbi.1009367> PMID: 34516544
28. Capewell P, Atkins K, Weir W, Jamonneau V, Camara M, Clucas C, et al. Resolving the apparent transmission paradox of African sleeping sickness. *PLoS Biol.* 2019;17(1):e3000105. <https://doi.org/10.1371/journal.pbio.3000105> PMID: 30633739
29. Büscher P, Cecchi G, Jamonneau V, Priotto G. Human African trypanosomiasis. *Lancet.* 2017;390(10110):2397–409. [https://doi.org/10.1016/S0140-6736\(17\)31510-6](https://doi.org/10.1016/S0140-6736(17)31510-6) PMID: 28673422
30. Betu Kumeso VK, Kalonji WM, Rembray S, Valverde Mordt O, Ngolo Tete D, Prêtre A, et al. Efficacy and safety of acoziborole in patients with human African trypanosomiasis caused by *Trypanosoma brucei* gambiense: a multicentre, open-label, single-arm, phase 2/3 trial. *Lancet Infect Dis.* 2023;23(4):463–70. [https://doi.org/10.1016/S1473-3099\(22\)00660-0](https://doi.org/10.1016/S1473-3099(22)00660-0) PMID: 36460027
